# Supplementary material
Source: PubMed Central journal article supplement (PMC8374885)
Supplement: NIHMS1726468-supplement-Supplement.pdf [file NIHMS1726468-supplement-Supplement.pdf]

**Table S1.** Statistical comparisons between different exposure treatments within each killifish population.

| <b>Exposure comparisons</b> | <b>Population</b> | <b>Sex</b> | <b>Gene</b>    | <b>Adjusted <i>p</i>-value</b> | <b>Significance</b> |
|-----------------------------|-------------------|------------|----------------|--------------------------------|---------------------|
| Vehicle_PCB126              | SC                | Pooled     | <i>Cyp1a</i>   | 0.017                          | *                   |
| Vehicle_PCB153              | SC                | Pooled     | <i>Cyp1a</i>   | >0.999                         | Not significant     |
| Vehicle_Mix PCB126/153      | SC                | Pooled     | <i>Cyp1a</i>   | <0.001                         | ***                 |
| Vehicle_PCB126              | SC                | Pooled     | <i>Pxr</i>     | 0.741                          | Not significant     |
| Vehicle_PCB153              | SC                | Pooled     | <i>Pxr</i>     | 0.963                          | Not significant     |
| Vehicle_Mix PCB126/153      | SC                | Pooled     | <i>Pxr</i>     | 0.991                          | Not significant     |
| Vehicle_PCB126              | SC                | Pooled     | <i>Cyp3a56</i> | 0.989                          | Not significant     |
| Vehicle_PCB153              | SC                | Pooled     | <i>Cyp3a56</i> | 0.475                          | Not significant     |
| Vehicle_Mix PCB126/153      | SC                | Pooled     | <i>Cyp3a56</i> | 0.881                          | Not significant     |
| Vehicle_PCB126              | NBH               | Pooled     | <i>Cyp1a</i>   | 0.878                          | Not significant     |
| Vehicle_PCB153              | NBH               | Pooled     | <i>Cyp1a</i>   | 0.791                          | Not significant     |
| Vehicle_Mix PCB126/153      | NBH               | Pooled     | <i>Cyp1a</i>   | >0.999                         | Not significant     |
| Vehicle_PCB126              | NBH               | Pooled     | <i>Pxr</i>     | 0.112                          | Not significant     |
| Vehicle_PCB153              | NBH               | Pooled     | <i>Pxr</i>     | 0.328                          | Not significant     |
| Vehicle_Mix PCB126/153      | NBH               | Pooled     | <i>Pxr</i>     | 0.973                          | Not significant     |
| Vehicle_PCB126              | NBH               | Pooled     | <i>Cyp3a56</i> | >0.999                         | Not significant     |
| Vehicle_PCB153              | NBH               | Pooled     | <i>Cyp3a56</i> | 0.442                          | Not significant     |
| Vehicle_Mix PCB126/153      | NBH               | Pooled     | <i>Cyp3a56</i> | >0.999                         | Not significant     |

|                        |     |         |                |        |                 |
|------------------------|-----|---------|----------------|--------|-----------------|
| Vehicle_PCB126         | SC  | Females | <i>Cyp1a</i>   | 0.388  | Not significant |
| Vehicle_PCB153         | SC  | Females | <i>Cyp1a</i>   | 0.982  | Not significant |
| Vehicle_Mix PCB126/153 | SC  | Females | <i>Cyp1a</i>   | 0.085  | Not significant |
| Vehicle_PCB126         | SC  | Females | <i>Pxr</i>     | >0.999 | Not significant |
| Vehicle_PCB153         | SC  | Females | <i>Pxr</i>     | 0.975  | Not significant |
| Vehicle_Mix PCB126/153 | SC  | Females | <i>Pxr</i>     | >0.999 | Not significant |
| Vehicle_PCB126         | SC  | Females | <i>Cyp3a56</i> | >0.999 | Not significant |
| Vehicle_PCB153         | SC  | Females | <i>Cyp3a56</i> | 0.012  | *               |
| Vehicle_Mix PCB126/153 | SC  | Females | <i>Cyp3a56</i> | 0.435  | Not significant |
| Vehicle_PCB126         | NBH | Females | <i>Cyp1a</i>   | >0.999 | Not significant |
| Vehicle_PCB153         | NBH | Females | <i>Cyp1a</i>   | >0.999 | Not significant |
| Vehicle_Mix PCB126/153 | NBH | Females | <i>Cyp1a</i>   | 0.971  | Not significant |
| Vehicle_PCB126         | NBH | Females | <i>Pxr</i>     | 0.979  | Not significant |
| Vehicle_PCB153         | NBH | Females | <i>Pxr</i>     | 0.977  | Not significant |
| Vehicle_Mix PCB126/153 | NBH | Females | <i>Pxr</i>     | >0.999 | Not significant |
| Vehicle_PCB126         | NBH | Females | <i>Cyp3a56</i> | 0.143  | Not significant |
| Vehicle_PCB153         | NBH | Females | <i>Cyp3a56</i> | 0.479  | Not significant |
| Vehicle_Mix PCB126/153 | NBH | Females | <i>Cyp3a56</i> | 0.990  | Not significant |

|                        |     |       |                |        |                 |
|------------------------|-----|-------|----------------|--------|-----------------|
| Vehicle_PCB126         | SC  | Males | <i>Cyp1a</i>   | 0.010  | **              |
| Vehicle_PCB153         | SC  | Males | <i>Cyp1a</i>   | >0.999 | Not significant |
| Vehicle_Mix PCB126/153 | SC  | Males | <i>Cyp1a</i>   | <0.001 | ***             |
| Vehicle_PCB126         | SC  | Males | <i>Pxr</i>     | 0.692  | Not significant |
| Vehicle_PCB153         | SC  | Males | <i>Pxr</i>     | 0.995  | Not significant |
| Vehicle_Mix PCB126/153 | SC  | Males | <i>Pxr</i>     | 0.997  | Not significant |
| Vehicle_PCB126         | SC  | Males | <i>Cyp3a56</i> | 0.955  | Not significant |
| Vehicle_PCB153         | SC  | Males | <i>Cyp3a56</i> | >0.999 | Not significant |
| Vehicle_Mix PCB126/153 | SC  | Males | <i>Cyp3a56</i> | 0.999  | Not significant |
| Vehicle_PCB126         | NBH | Males | <i>Cyp1a</i>   | 0.205  | Not significant |
| Vehicle_PCB153         | NBH | Males | <i>Cyp1a</i>   | 0.072  | Not significant |
| Vehicle_Mix PCB126/153 | NBH | Males | <i>Cyp1a</i>   | >0.999 | Not significant |
| Vehicle_PCB126         | NBH | Males | <i>Pxr</i>     | 0.051  | Not significant |
| Vehicle_PCB153         | NBH | Males | <i>Pxr</i>     | 0.283  | Not significant |
| Vehicle_Mix PCB126/153 | NBH | Males | <i>Pxr</i>     | 0.803  | Not significant |
| Vehicle_PCB126         | NBH | Males | <i>Cyp3a56</i> | 0.381  | Not significant |
| Vehicle_PCB153         | NBH | Males | <i>Cyp3a56</i> | 0.724  | Not significant |
| Vehicle_Mix PCB126/153 | NBH | Males | <i>Cyp3a56</i> | 0.857  | Not significant |

---

SC (Scorton Creek, MA, USA)

NBH (New Bedford Harbor, MA, USA)

**Table S2.** Statistical comparisons between the two killifish populations.

| <b>Population comparisons</b> | <b>Sex</b> | <b>Gene</b>    | <b>Adjusted <i>p</i>-value</b> | <b>Significance</b> |
|-------------------------------|------------|----------------|--------------------------------|---------------------|
| Vehicle SC_Vehicle NBH        | Pooled     | <i>Cyp1a</i>   | 0.003                          | **                  |
| PCB126 SC_PCB126 NBH          | Pooled     | <i>Cyp1a</i>   | <0.001                         | ***                 |
| PCB153 SC_PCB153 NBH          | Pooled     | <i>Cyp1a</i>   | <0.001                         | ***                 |
| Mix SC_Mix NBH                | Pooled     | <i>Cyp1a</i>   | <0.001                         | ***                 |
| Vehicle SC_Vehicle NBH        | Pooled     | <i>Pxr</i>     | 0.580                          | Not significant     |
| PCB126 SC_PCB126 NBH          | Pooled     | <i>Pxr</i>     | 0.997                          | Not significant     |
| PCB153 SC_PCB153 NBH          | Pooled     | <i>Pxr</i>     | 0.843                          | Not significant     |
| Mix SC_Mix NBH                | Pooled     | <i>Pxr</i>     | 0.708                          | Not significant     |
| Vehicle SC_Vehicle NBH        | Pooled     | <i>Cyp3a56</i> | >0.999                         | Not significant     |
| PCB126 SC_PCB126 NBH          | Pooled     | <i>Cyp3a56</i> | 0.850                          | Not significant     |
| PCB153 SC_PCB153 NBH          | Pooled     | <i>Cyp3a56</i> | <0.001                         | ***                 |
| Mix SC_Mix NBH                | Pooled     | <i>Cyp3a56</i> | 0.473                          | Not significant     |
| Vehicle SC_Vehicle NBH        | Females    | <i>Cyp1a</i>   | 0.168                          | Not significant     |
| PCB126 SC_PCB126 NBH          | Females    | <i>Cyp1a</i>   | <0.001                         | ***                 |
| PCB153 SC_PCB153 NBH          | Females    | <i>Cyp1a</i>   | 0.013                          | *                   |
| Mix SC_Mix NBH                | Females    | <i>Cyp1a</i>   | <0.001                         | ***                 |
| Vehicle SC_Vehicle NBH        | Females    | <i>Pxr</i>     | 0.973                          | Not significant     |

|                        |         |                |        |                 |
|------------------------|---------|----------------|--------|-----------------|
| PCB126 SC_PCB126 NBH   | Females | <i>Pxr</i>     | 0.998  | Not significant |
| PCB153 SC_PCB153 NBH   | Females | <i>Pxr</i>     | 0.978  | Not significant |
| Mix SC_Mix NBH         | Females | <i>Pxr</i>     | 0.977  | Not significant |
| Vehicle SC_Vehicle NBH | Females | <i>Cyp3a56</i> | 0.528  | Not significant |
| PCB126 SC_PCB126 NBH   | Females | <i>Cyp3a56</i> | >0.999 | Not significant |
| PCB153 SC_PCB153 NBH   | Females | <i>Cyp3a56</i> | <0.001 | ***             |
| Mix SC_Mix NBH         | Females | <i>Cyp3a56</i> | 0.062  | Not significant |
| Vehicle SC_Vehicle NBH | Males   | <i>Cyp1a</i>   | 0.031  | *               |
| PCB126 SC_PCB126 NBH   | Males   | <i>Cyp1a</i>   | <0.001 | ***             |
| PCB153 SC_PCB153 NBH   | Males   | <i>Cyp1a</i>   | <0.001 | ***             |
| Mix SC_Mix NBH         | Males   | <i>Cyp1a</i>   | <0.001 | ***             |
| Vehicle SC_Vehicle NBH | Males   | <i>Pxr</i>     | 0.426  | Not significant |
| PCB126 SC_PCB126 NBH   | Males   | <i>Pxr</i>     | >0.999 | Not significant |
| PCB153 SC_PCB153 NBH   | Males   | <i>Pxr</i>     | 0.969  | Not significant |
| Mix SC_Mix NBH         | Males   | <i>Pxr</i>     | 0.895  | Not significant |
| Vehicle SC_Vehicle NBH | Males   | <i>Cyp3a56</i> | 0.963  | Not significant |
| PCB126 SC_PCB126 NBH   | Males   | <i>Cyp3a56</i> | 0.360  | Not significant |
| PCB153 SC_PCB153 NBH   | Males   | <i>Cyp3a56</i> | 0.979  | Not significant |
| Mix SC_Mix NBH         | Males   | <i>Cyp3a56</i> | 0.984  | Not significant |

---

SC (Scorton Creek, MA, USA)

NBH (New Bedford Harbor, MA, USA)

Mix (PCB126/PCB153)

**Table S3.** *Cyp1a* and *Pxr* mRNA levels in gills in F1/F2 generation killifish, separated by sexes.

| <b>Treatment</b>                                     | <b><i>Cyp1a</i> – Males</b>                              | <b><i>Cyp1a</i> – Females</b>                | <b><i>Pxr</i> – Males</b>                   | <b><i>Pxr</i> – Females</b>                 |
|------------------------------------------------------|----------------------------------------------------------|----------------------------------------------|---------------------------------------------|---------------------------------------------|
| <b>Scorton Creek population – F1 Generation</b>      |                                                          |                                              |                                             |                                             |
| Vehicle                                              | 0.066 ±0.032 (n=5)                                       | 0.024 ±0.007 (n=3)                           | 0.003 ±0.002 (n=5)                          | 0.002 ±0.0005 (n=3)                         |
| PCB126                                               | 0.414 ±0.204 (n=5)<br><b>adj. <i>p</i> = 0.010 **</b>    | 0.102 ±0.024 (n=4)<br>adj. <i>p</i> = 0.388  | 0.002 ±0.001 (n=5)<br>adj. <i>p</i> = 0.692 | 0.002 ±0.001 (n=4)<br>adj. <i>p</i> >0.999  |
| PCB153                                               | 0.066 ±0.034 (n=6)<br>adj. <i>p</i> >0.999               | 0.046 ±0.021 (n=5)<br>adj. <i>p</i> = 0.982  | 0.004 ±0.001 (n=6)<br>adj. <i>p</i> = 0.995 | 0.003 ±0.001 (n=5)<br>adj. <i>p</i> = 0.975 |
| Mix PCB126/153                                       | 0.870 ±0.447 (n=5)<br><b>adj. <i>p</i> &lt;0.001 ***</b> | 0.196 ±0.095 (n=4)<br>adj. <i>p</i> = 0.085  | 0.003 ±0.001 (n=5)<br>adj. <i>p</i> = 0.997 | 0.002 ±0.0004 (n=4)<br>adj. <i>p</i> >0.999 |
| <b>New Bedford Harbor population – F2 Generation</b> |                                                          |                                              |                                             |                                             |
| Vehicle                                              | 0.020 ±0.020 (n=5)                                       | 0.007 ±0.010 (n=5)                           | 0.007 ±0.005 (n=5)                          | 0.004 ±0.003 (n=5)                          |
| PCB126                                               | 0.004 ±0.003 (n=4)<br>adj. <i>p</i> = 0.205              | 0.005 ±0.002 (n=4)<br>adj. <i>p</i> >0.999   | 0.002 ±0.001 (n=4)<br>adj. <i>p</i> = 0.051 | 0.003 ±0.002 (n=4)<br>adj. <i>p</i> = 0.979 |
| PCB153                                               | 0.003 ±0.001 (n=5)<br>adj. <i>p</i> = 0.072              | 0.009 ±0.008 (n=5)<br>adj. <i>p</i> >0.999   | 0.004 ±0.003 (n=5)<br>adj. <i>p</i> = 0.283 | 0.002 ±0.001 (n=5)<br>adj. <i>p</i> = 0.977 |
| Mix PCB126/153                                       | 0.017 ±0.018 (n=5)<br>adj. <i>p</i> >0.999               | 0.002 ±0.0004 (n=3)<br>adj. <i>p</i> = 0.971 | 0.004 ±0.001 (n=5)<br>adj. <i>p</i> = 0.803 | 0.003 ±0.0004 (n=3)<br>adj. <i>p</i> >0.999 |

Each value represents the mean and the mRNA data are presented as  $2^{-\Delta Ct(\text{target gene}-ef1a)} \pm$  standard deviation. The number of fish (n) are presented in parenthesis followed by sex-specific two-way ANOVA Tukey adjusted (adj.) *p*-value comparing PCB treatment to vehicle control. \* *p* < 0.05 and \*\*\* *p* < 0.001.
